# Supplementary material for: Three-dimensional variations in the lower limb caused by the windlass mechanism
Source: PeerJ. 2017 Dec 18;5:e4103. doi: 10.7717/peerj.4103 (PMC5738965; doi:10.7717/peerj.4103)
Supplement: Supplemental Information 1 [file peerj-05-4103-s001.xlsx]

## Sheet: Dependent Sensor - Extension
SUBJECT	1st MTPJ - Extension	1st metatarsal - plantar flexion	1st metatarsal - pronosupination	Tibia - Rotation	Femur - Rotation	STJ localisation axis
1	27.66	1.251	0.177	0.773	2.038	11
2	7.089	0.085	1.148	1.21	0.339	9
3	10.354	11.325	0.754	0.736	3.716	12
4	2.653	17.481	10.952	0.394	0.75	8
5	6.532	1.198	4.188	0.01	0.368	8
6	4.65	0.592	1.196	0.148	0.145	7
7	4.362	6.712	15.266	0.267	0.034	9
8	4.935	0.684	2.521	0.082	0.554	14
9	4.31	4.522	2.797	1.091	1.235	7
10	5.019	4.501	35.712	0.24	0.24	8
11	5.531	2.663	6.202	0.249	0.806	9
12	3.339	34.295	11.386	0.03	1.053	8
13	5.149	8.614	0.896	0.12	0.419	7
14	3.729	2.273	1.264	0.992	0.413	8
15	3.104	2.334	6.02	1.767	0.365	12

## Sheet: 45º Extension
SUBJECT	1st MTPJ - Extension	1st metatarsal - plantar flexion	1st metatarsal - pronosupination	Tibia - Rotation	Femur - Rotation	STJ localisation axis
1	45.05	3.67	8.44	0.28	0.52	11
2	45.1	2.85	0.74	0.23	0.02	9
3	44.99	4.8	0.1	1.57	0.22	12
4	44.84	6.63	3.13	0.07	1.19	8
5	45.04	1.05	2.06	1.69	3.53	8
6	36.22	1.31	0.51	0.3	0.49	7
7	45.01	3.62	0.12	0.5	0.42	9
8	45	4.31	3.47	0.23	0.47	14
9	45	3.77	1.7	0.87	0.18	7
10	44.55	6.48	28.64	0.96	2.19	8
11	45.21	4.16	0.005	0.19	2.31	9
12	34.31	3.32	2.73	0.06	1.04	8
13	41.67	3.46	2.08	0.18	0.34	7
14	38.89	1.03	1.13	1.69	4.7	8
15	44.99	6.57	3.82	0.64	0.53	12

## Sheet: Maximum Extension
SUBJECT	1st MTPJ - Extension	1st metatarsal - plantar flexion	1st metatarsal - pronosupination	Tibia - Rotation	Femur - Rotation	STJ localisation axis
1	53.22	4.39	8.93	0.25	0.44	11
2	46.89	3.08	0.83	0.49	0.17	9
3	48.65	4.81	1.02	0.02	0.62	12
4	52.77	7.78	4.09	0.6	1.1	8
5	63.03	4.12	4.38	1.5	3.67	8
6	36.22	1.31	0.51	0.3	0.49	7
7	47.1	3.66	0.73	0.51	1.17	9
8	60.23	6.38	3.9	0.79	0.9	14
9	47.59	3.95	1.05	0.91	0.27	7
10	44.55	6.48	28.64	0.96	2.19	8
11	57.17	4.99	1.17	0.47	1.29	9
12	34.31	3.32	2.73	0.06	1.04	8
13	41.67	3.46	2.08	0.18	0.34	7
14	38.89	1.03	1.13	1.69	4.7	8
15	51.43	6.7	3.98	0.24	1.31	12
